# Supplementary material for: MiR-200b/200c/429 subfamily negatively regulates Rho/ROCK signaling pathway to suppress hepatocellular carcinoma metastasis
Source: PubMed Central journal article supplement (PMC4537040; doi:10.18632/oncotarget.3700), 2015-03-30
Supplement: oncotarget-06-13658-s001.pdf [file oncotarget-06-13658-s001.pdf]

# MiR-200b/200c/429 subfamily negatively regulates Rho/ROCK signaling pathway to suppress hepatocellular carcinoma metastasis

## Supplementary Material

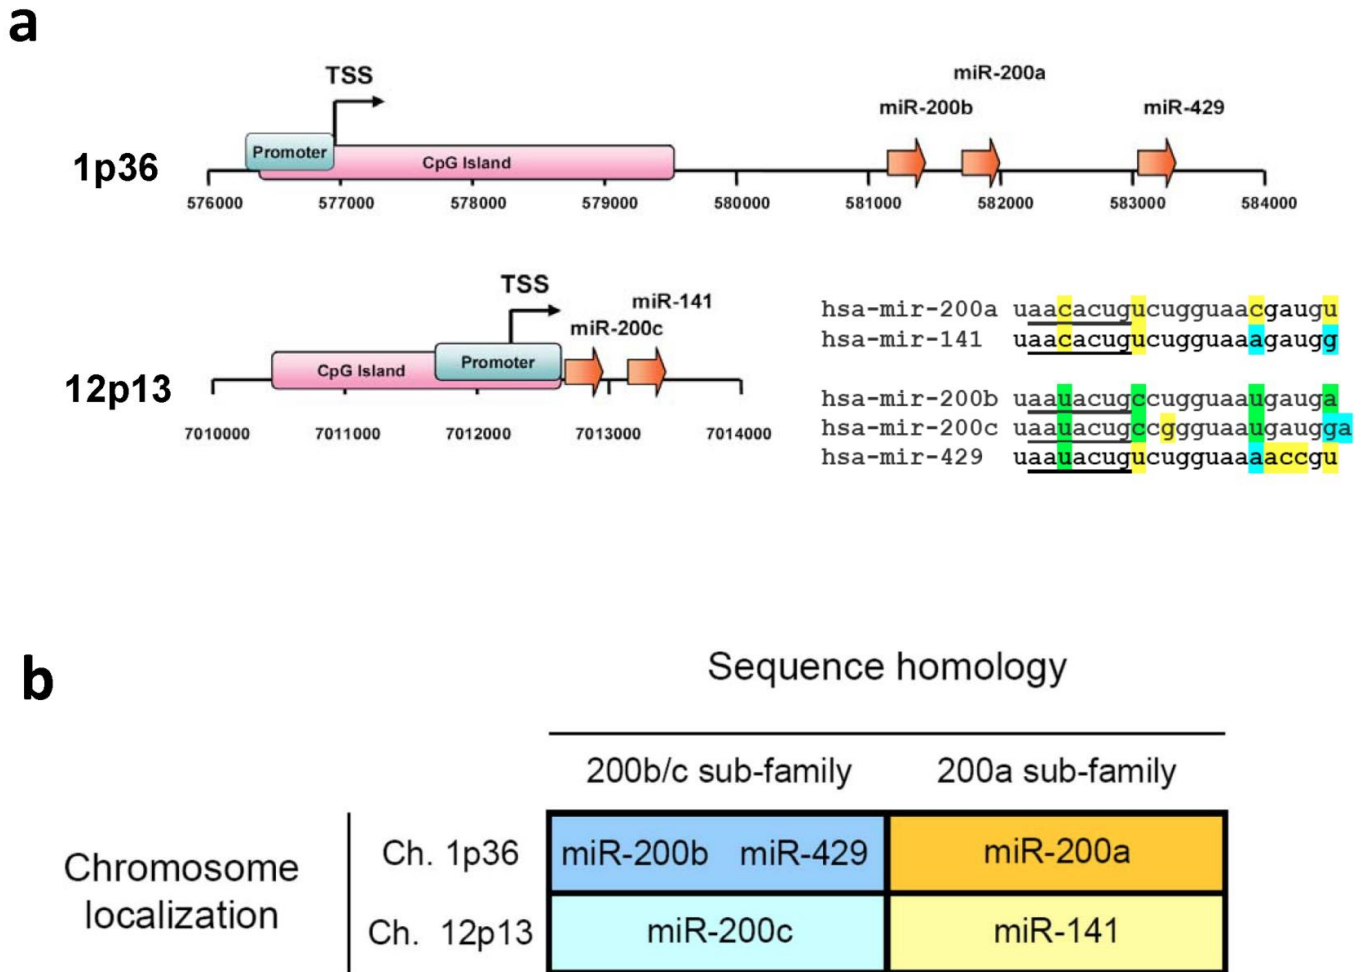

**Supplementary Figure 1:** Chromosomal location and sequence homology of the miR-200 family members. **(a)** Chromosomal position was based on Genebank record NT\_004350 and NT\_009759. MiRNA seed sequences were underlined and sequence variants among the miR-200 family members were highlighted with colored boxes. **(b)** The miR-200 family can be subdivided in two groups, either by their chromosome location or their seed sequence homology. The miR-200 family members at the same cluster are co-regulated by their upstream promoter, whereas their functions are determined by their seed-sequence homology.

H2P cell line: Primary HCC from a 42-years old male patient  
H2M cell line: metastatic thrombosis in the portal vein from the same patient

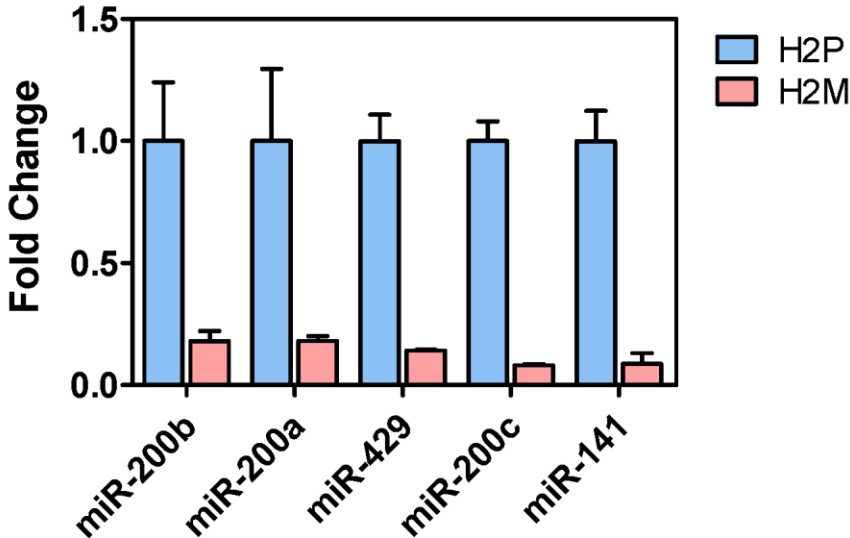

**Supplementary Figure 2:** Expression of the miR-200 family in a pair of HCC cell lines derived from the primary tumor (H2P) and portal vein metastasis (H2M) of the same patient. Expression levels of primary miR-200 transcripts were determined by qRT-PCR and normalized with GAPDH.

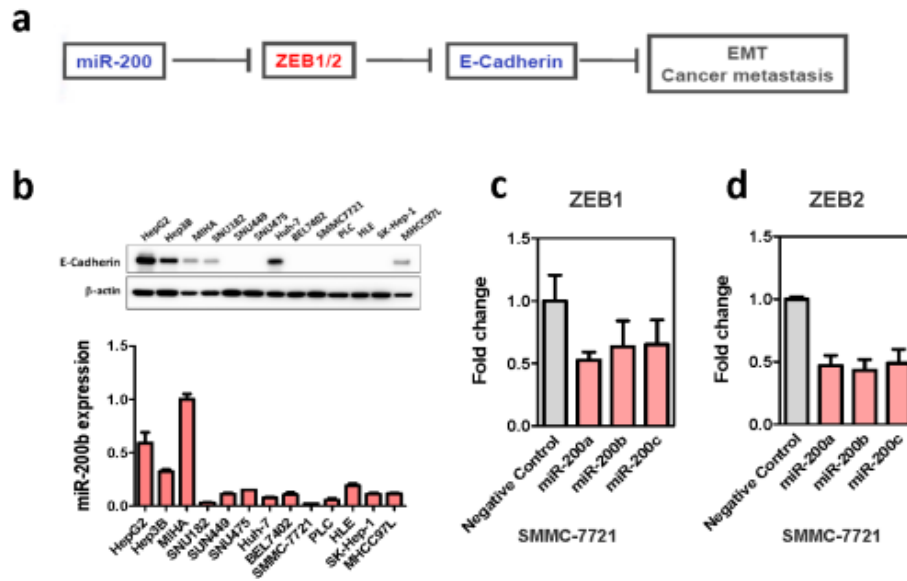

**Supplementary Figure 3:** The miR-200 family suppressed ZEB1 and ZEB2 expression in human HCC cells. (a) Schematic diagram illustrating the well characterized miR-200/ZEB1/2/E-cadherin axis in EMT and cancer metastasis. (b) The expression levels of E-cadherin and miR-200b in HCC cell lines correlated with each other. (c) Transient overexpression of miR-200a, miR-200b and miR-200c precursors all significantly suppressed the expression of ZEB1 and ZEB2 in HCC cell lines.

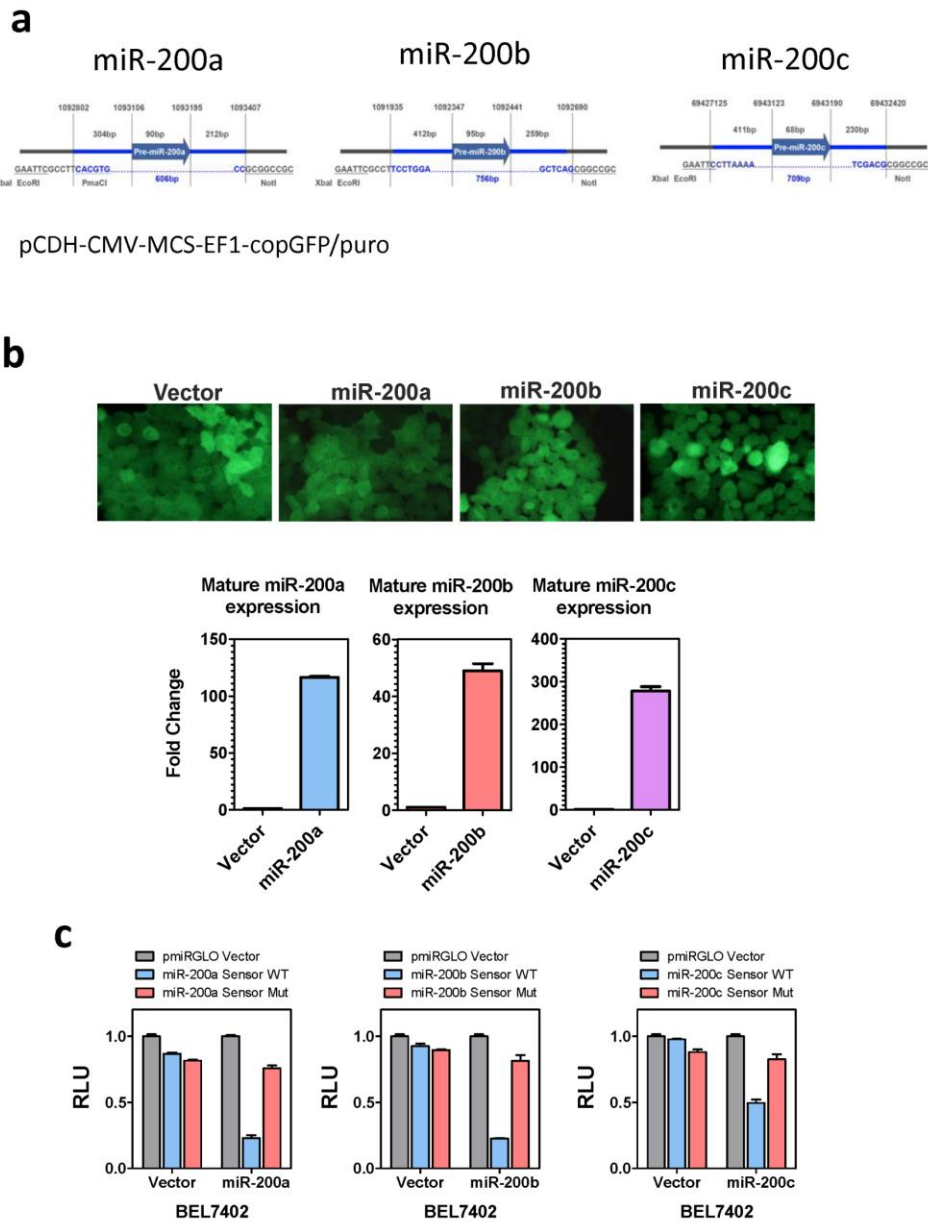

**Supplementary Figure 4:** Establishment of miR-200 stably overexpressing cells. **(a)** MiR-200a, miR-200b and miR-200c were amplified from MIHA genomic DNA and subcloned into a lenti-viral expression vector, pCDH-CMV-MSC-EF1-copGFP/puro (Systems Biosciences). **(b)** Successful stable overexpression of miR-200s was confirmed with GFP marker and qRT-PCR. **(c)** The transcriptional repressive activities of ectopically expressed miR-200s were confirmed by wild-type and seed-sequence mutated miRNA sensors (mature miRNA complementary sequences).

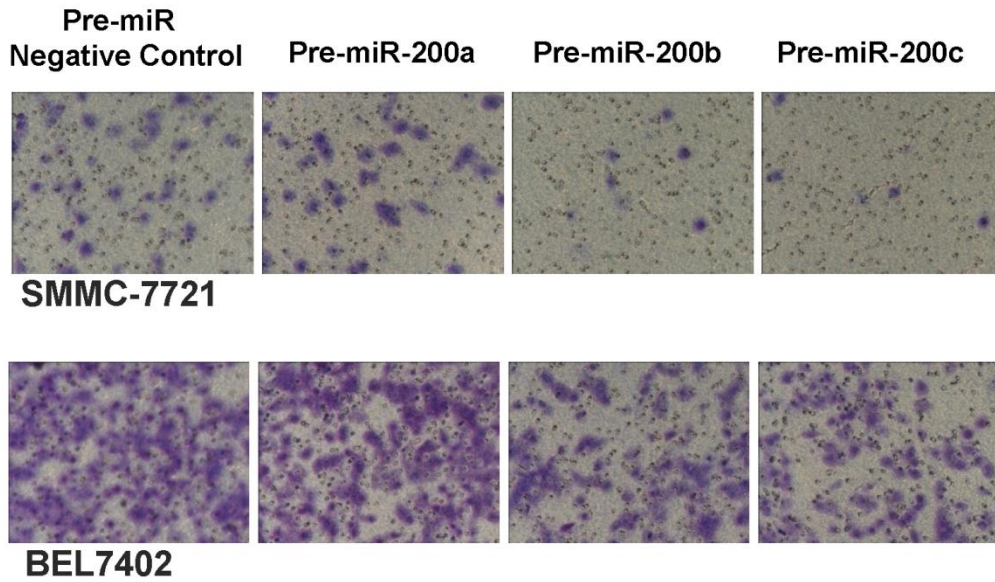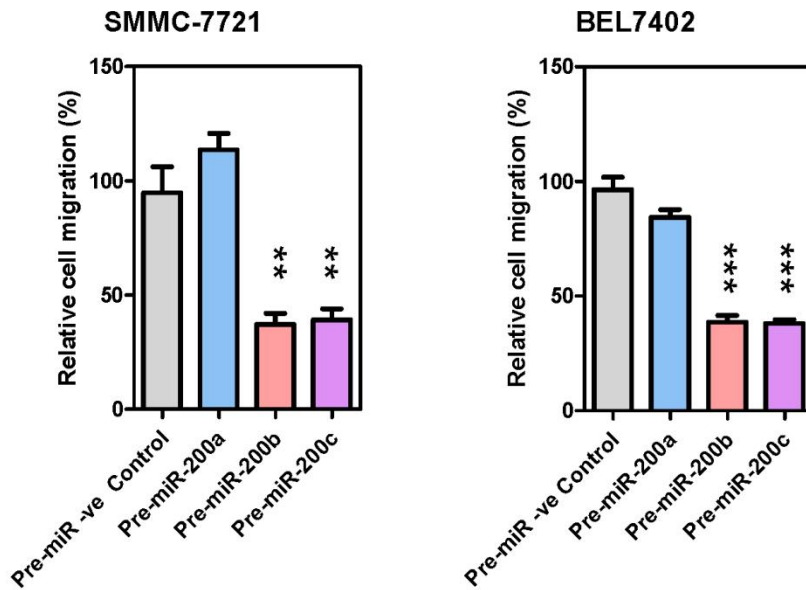

**Supplementary Figure 5:** Transient overexpression of miR-200b and miR-200c precursors suppressed HCC cell migration. HCC cells were transiently transfected with miR-200 precursors and their effect on cell migration was examined by Transwell cell migration assay. Consistent with the miR-200 stable overexpression model, expression of miR-200b and miR-200c (but not miR-200a) precursors significantly suppressed cell migration in both SMMC-7721 and BEL7402 cell lines. \*\*  $P < 0.01$ , \*\*\*  $P < 0.001$ , t-test.

| <b>RhoA</b> |              |                   |
|-------------|--------------|-------------------|
|             | miR-200a/141 | miR-200b/200c/429 |
| EIMMO       | X            | ○                 |
| TargetScan  | X            | ○                 |
| miRanda     | X            | ○                 |

  

| <b>ROCK2</b> |              |                   |
|--------------|--------------|-------------------|
|              | miR-200a/141 | miR-200b/200c/429 |
| EIMMO        | X            | ○                 |
| TargetScan   | X            | ○                 |
| miRanda      | X            | ○                 |

**Supplementary Figure 6:** MiRNA target prediction algorithms consistently predicted RhoA and ROCK2 as the specific down-stream targets of the miR-200b subfamily. ○: Predicted targets, ×: Non-targets.

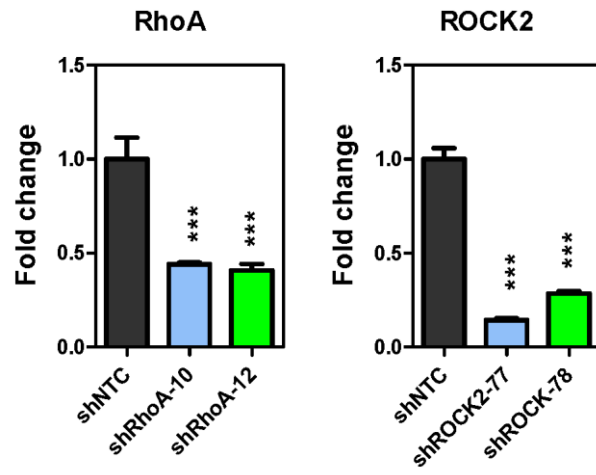

**Supplementary Figure 7:** Knockdown of RhoA and ROCK2 in BEL7402 cells by two independent shRNA sequences as verified by qRT-PCR.

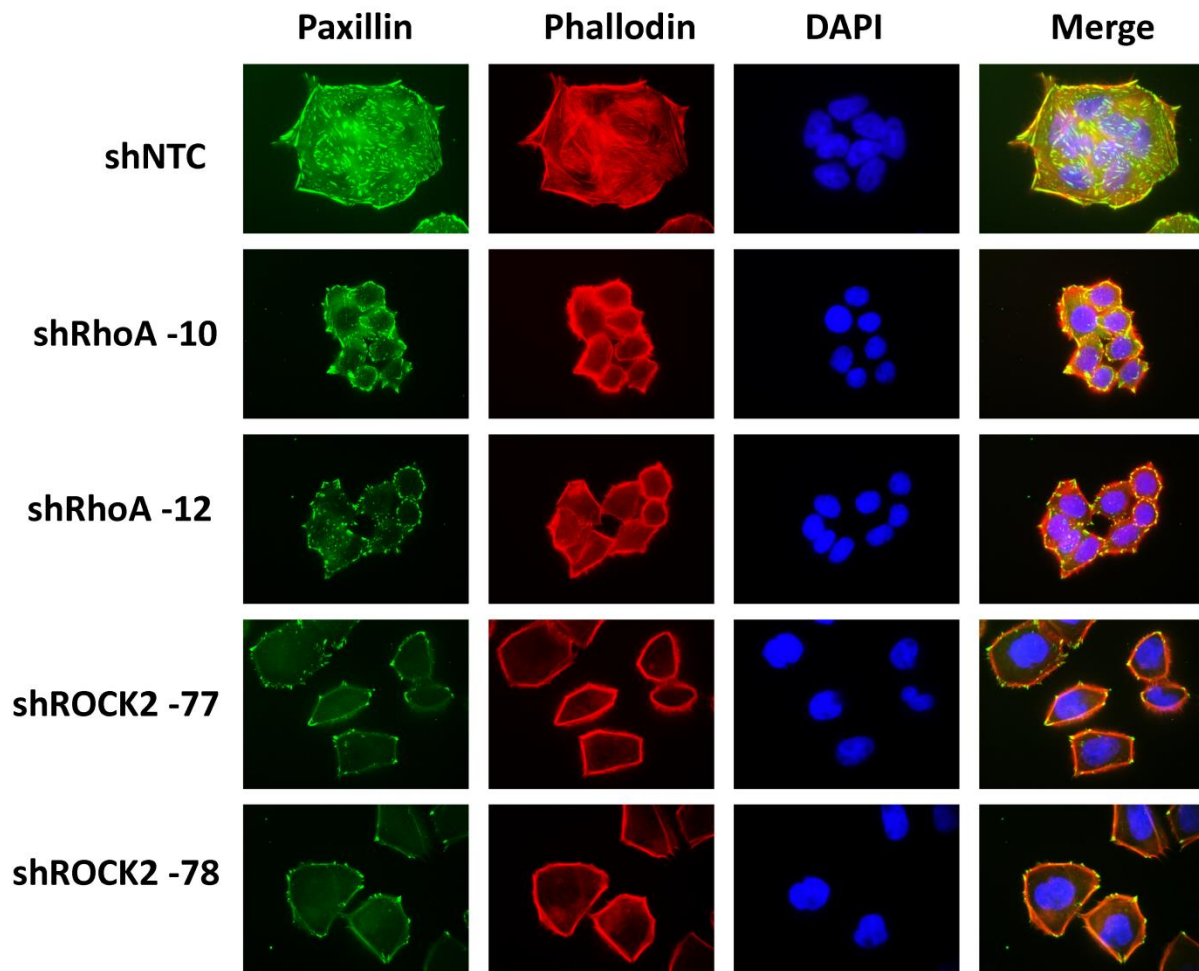

**Supplementary Figure 8:** Knockdown of RhoA (shRhoA-10 and -12) and ROCK2 (shROCK2-77 and -78) phenocopied miR-200b sub-family overexpression in suppressing stress-fiber and focal adhesion formation.



**Supplementary Table 1:** Gene ontology (GO) analysis performed by EIMMO miRNA prediction server.

**Gene ontology (GO) analysis performed by EIMMO microRNA prediction server**

| <b>miR-200a/141</b>        |                                                             |                              |
|----------------------------|-------------------------------------------------------------|------------------------------|
|                            | GO Term                                                     | Bonferonni corrected p-Value |
| Cellular component         | nucleus                                                     | 3.01E-12                     |
|                            | protein phosphatase type 2A complex                         | 1.21E-03                     |
|                            | microtubule associated complex                              | 2.11E-02                     |
| Biological process         | protein amino acid phosphorylation                          | 4.57E-09                     |
|                            | regulation of transcription from RNA polymerase II promoter | 4.84E-05                     |
|                            | regulation of transcription, DNA-dependent                  | 2.46E-03                     |
|                            | morphogenesis                                               | 1.97E-02                     |
| <b>miR-200b/200c/429</b>   |                                                             |                              |
|                            | GO Term                                                     | Bonferonni corrected p-Value |
| Cellular component         | nucleus                                                     | 2.47E-11                     |
|                            | cytoskeleton                                                | 1.15E-05                     |
|                            | voltage-gated sodium channel complex                        | 1.85E-03                     |
|                            | ubiquitin ligase complex                                    | 9.40E-03                     |
|                            | nuclear inner membrane                                      | 1.87E-02                     |
|                            | euchromatin                                                 | 1.87E-02                     |
|                            | nuclear matrix                                              | 2.61E-02                     |
|                            | Golgi apparatus                                             | 3.61E-02                     |
| Biological process         | regulation of transcription, DNA-dependent                  | 7.23E-08                     |
|                            | protein amino acid phosphorylation                          | 8.66E-06                     |
|                            | small GTPase mediated signal transduction                   | 4.30E-03                     |
|                            | intracellular signaling cascade                             | 1.40E-02                     |
|                            | regulation of transcription from RNA polymerase II promoter | 1.55E-02                     |
| Common                     |                                                             |                              |
| miR-200a/141 specific      |                                                             |                              |
| miR-200b/200c/429 specific |                                                             |                              |

**Supplementary Video 1:** BEL7402 vector stable overexpressing cells

**Supplementary Video 2:** BEL7402 miR-200a stable overexpressing cells

**Supplementary Video 3:** BEL7402 miR-200b stable overexpressing cells

**Supplementary Video 4:** BEL7402 miR-200c stable overexpressing cells
